# Supplementary material for: Identification of Enhanced Vaccine Mimotopes for the p15E Murine Cancer Antigen
Source: PubMed Central journal article supplement (PMC10986479; doi:10.1158/2767-9764.crc-23-0384), 2024-04-02
Supplement: crc-23-0384-s01.pdf [file crc-23-0384-s01.pdf]

## Supplementary Figure 1

### Identification of Enhanced Vaccine Mimotopes for the p15E Murine Cancer Antigen

Shiqi Zhou<sup>1</sup>, Yiting Song<sup>1</sup>, Yuan Luo<sup>1</sup>, Brendan Quinn<sup>1</sup>, Yang Jiao<sup>1</sup>, Mark D. Long<sup>2</sup>, Scott I. Abrams<sup>3</sup>, Jonathan F. Lovell<sup>1\*</sup>

<sup>1</sup> Department of Biomedical Engineering, State University of New York at Buffalo, Buffalo, NY 14260, USA

<sup>2</sup> Department of Biostatistics & Bioinformatics, Roswell Park Comprehensive Cancer Center, Buffalo, NY 14263, USA

<sup>3</sup> Department of Immunology, Roswell Park Comprehensive Cancer Center Roswell Park Comprehensive Cancer Center, Buffalo, NY 14263, USA

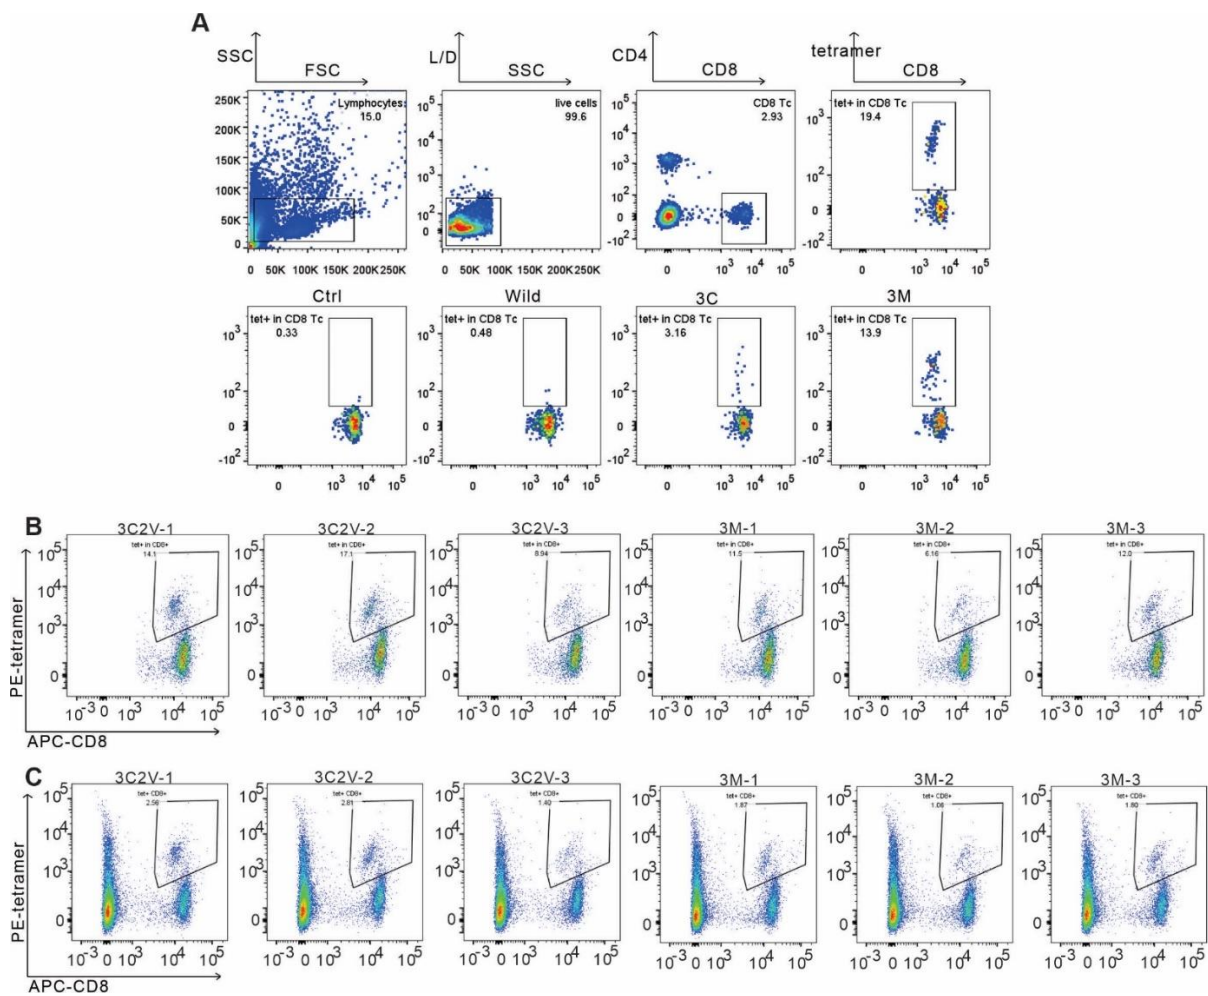

**Supplementary Figure S1.** Flow cytometry cell gating strategy for **A)** targeting p15E wild type peptide antigen-specific CD8 T cell; Flow cytometry cell gating strategy for sorted **B)** antigen-specific and CD8 T cell-specific double positive cell percentage in all cells and **C)** percentage of antigen-specific cell in all CD 8 T cells.
