# Supplementary material for: Identification of Enhanced Vaccine Mimotopes for the p15E Murine Cancer Antigen
Source: PubMed Central journal article supplement (PMC10986479; doi:10.1158/2767-9764.crc-23-0384), 2024-04-02
Supplement: crc-23-0384-s02.pdf [file crc-23-0384-s02.pdf]

## Supplementary Figure 2

### Identification of Enhanced Vaccine Mimotopes for the p15E Murine Cancer Antigen

Shiqi Zhou<sup>1</sup>, Yiting Song<sup>1</sup>, Yuan Luo<sup>1</sup>, Brendan Quinn<sup>1</sup>, Yang Jiao<sup>1</sup>, Mark D. Long<sup>2</sup>, Scott I. Abrams<sup>3</sup>, Jonathan F. Lovell<sup>1\*</sup>

<sup>1</sup> Department of Biomedical Engineering, State University of New York at Buffalo, Buffalo, NY 14260, USA

<sup>2</sup> Department of Biostatistics & Bioinformatics, Roswell Park Comprehensive Cancer Center, Buffalo, NY 14263, USA

<sup>3</sup> Department of Immunology, Roswell Park Comprehensive Cancer Center Roswell Park Comprehensive Cancer Center, Buffalo, NY 14263, USA

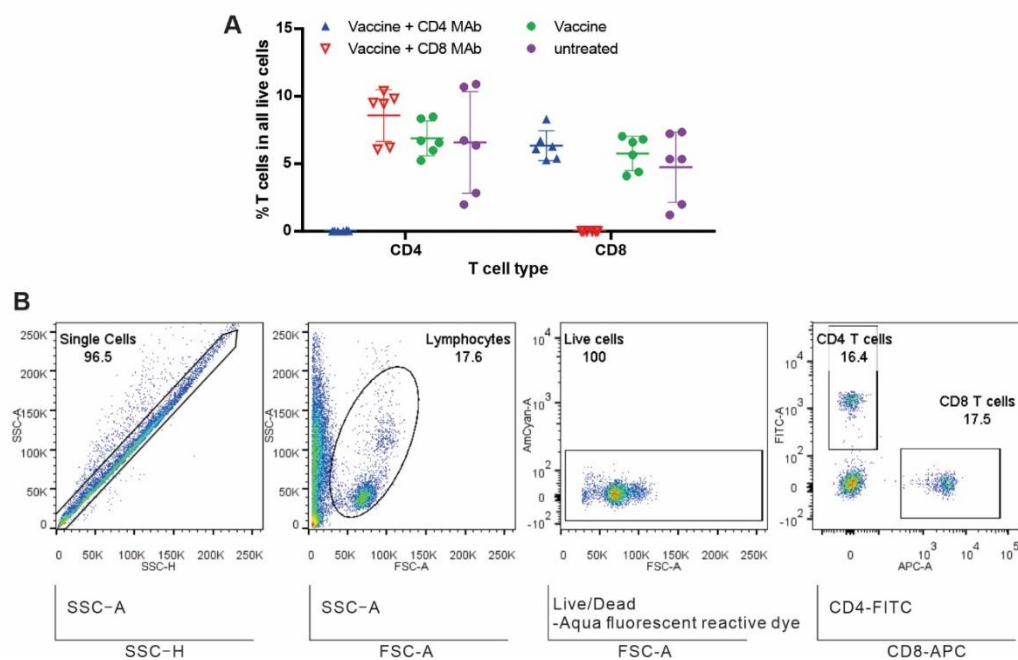

**Supplementary Figure S2. CD8<sup>+</sup> or CD4<sup>+</sup> T cells depletion with murine anti-CD8 or anti-CD4 monoclonal antibodies.** Mice received intramuscular injections of indicated vaccine on days 0 and 7 before receiving intraperitoneal injections of 400  $\mu$ g *InVivo*Mab anti-mouse CD8 $\alpha$  antibody or 400  $\mu$ g *InVivo*Mab anti-mouse CD4 antibody on day 12 and day 13. Mice blood was collected and stained for flow cytometry. **A)** the percentage of CD4<sup>+</sup> or CD8<sup>+</sup> T cells in all living cells; **B)** the gating strategy of a representative sample from the vaccine-only group.
