# Supplementary material for: Identification of Enhanced Vaccine Mimotopes for the p15E Murine Cancer Antigen
Source: PubMed Central journal article supplement (PMC10986479; doi:10.1158/2767-9764.crc-23-0384), 2024-04-02
Supplement: crc-23-0384-s03.pdf [file crc-23-0384-s03.pdf]

### Supplementary Figure 3 Identification of Enhanced Vaccine Mimotopes for the p15E Murine Cancer Antigen

Shiqi Zhou<sup>1</sup>, Yiting Song<sup>1</sup>, Yuan Luo<sup>1</sup>, Brendan Quinn<sup>1</sup>, Yang Jiao<sup>1</sup>, Mark D. Long<sup>2</sup>, Scott I. Abrams<sup>3</sup>, Jonathan F. Lovell<sup>1\*</sup>

<sup>1</sup> Department of Biomedical Engineering, State University of New York at Buffalo, Buffalo, NY 14260, USA

<sup>2</sup> Department of Biostatistics & Bioinformatics, Roswell Park Comprehensive Cancer Center, Buffalo, NY 14263, USA

<sup>3</sup> Department of Immunology, Roswell Park Comprehensive Cancer Center Roswell Park Comprehensive Cancer Center, Buffalo, NY 14263, USA

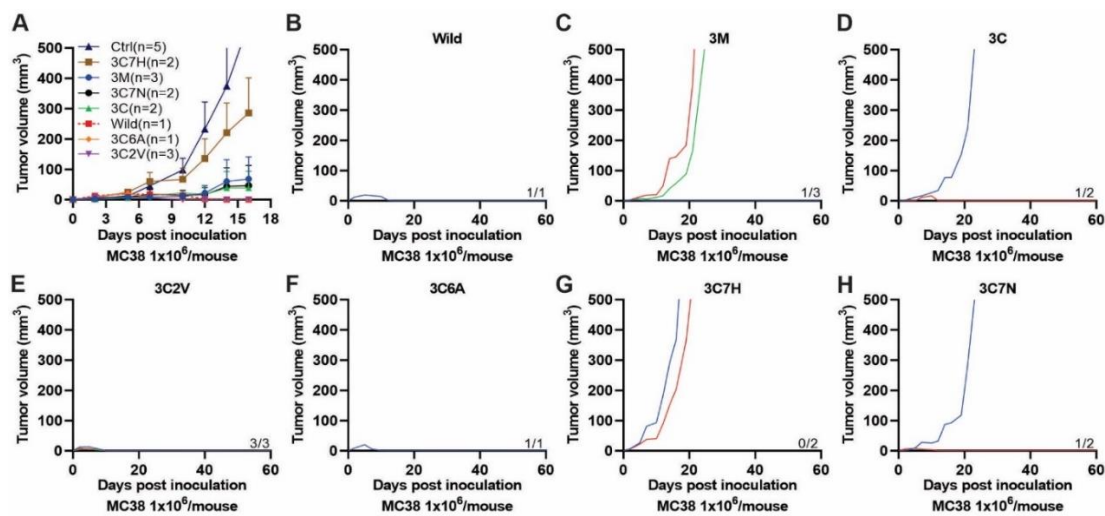

**Supplementary Figure S3. p15E-3C2V immunized mice showed long-term resistance to MC38 tumor (re)challenge.** One hundred days after the initial MC38 tumor challenge shown in Figure 5, mice that survived the 3C2V peptide vaccine and 5 new Ctrl mice were inoculated with 1x10<sup>6</sup> MC38 cells. Tumor volume of **A)** all mice; **B)** one mouse from the wild-type group immunized mouse; **C)** three mice from the 3M group; **D)** two mice from the 3C group; **E)** three mice from the 3C2V group; **F)** one mouse from the 3C6A group; **G)** two mice from the 3C7H group; and **H)** two mice from the 3C7N group. The number above the x-axis indicates the number of tumor-free mice out of all mice from the same group.
